# Supplementary material
Source: PubMed Central journal article supplement (PMC11504615)
Supplement: im3c00049_si_001.pdf [file im3c00049_si_001.pdf]

## Supplementary Information

### Circularly Polarized Microscopy of Thin Films of Chiral Organic Dyes

Andrea Taddeucci,<sup>a,b</sup> Francesco Zinna,<sup>a</sup> Giuliano Siligardi,<sup>b</sup> Lorenzo Di Bari<sup>\*,a</sup>

<sup>a</sup>Dipartimento di Chimica e Chimica Industriale, University of Pisa, Via Moruzzi 13, 56124 Pisa, Italy

<sup>b</sup>Diamond Light Source Ltd., Chilton, Didcot OX11 0DE, United Kingdom

\*Correspondence to Prof. Lorenzo Di Bari (lorenzo.dibari@unipi.it)

#### Materials and methods

The films were prepared by spin-coating (Laurell WS-650MZ-23NPPB) 150  $\mu$ L of a 2·10<sup>-2</sup> M solution of the material of interest in CH<sub>2</sub>Cl<sub>2</sub> onto a 25x25 mm<sup>2</sup> glass substrate. Spin coating conditions: 1000 rpm, 30 sec, acceleration 1000 rpm/sec. The film of (S,S)-PTPO **2** was then thermally annealed in an oven at 80 °C for 1 hour. The film of **1** was characterized without further post-deposition treatments.

#### Microscopy and optics

- Microscope: Zeiss Discovery V8. Magnification optics: microscope built-in.
- Microscope objective: Zeiss PlanApo S 1.0x, FWD = 60 mm.
- Camera: Canon PowerShot A640.
- Light source: Philips, 6423FO 150W GZ6.35 15V 1CT.
- Linear polarizer: microscope built-in.
- Quarter-wave plate: Thorlabs, AQWP05M-600.
- Bandpass filter: Edmund Optics traditional coated filter centered at 450 nm, FWHM = 80 nm, optical density (average)  $\geq 3.0$ , minimum transmission (%)  $\geq 60$ .

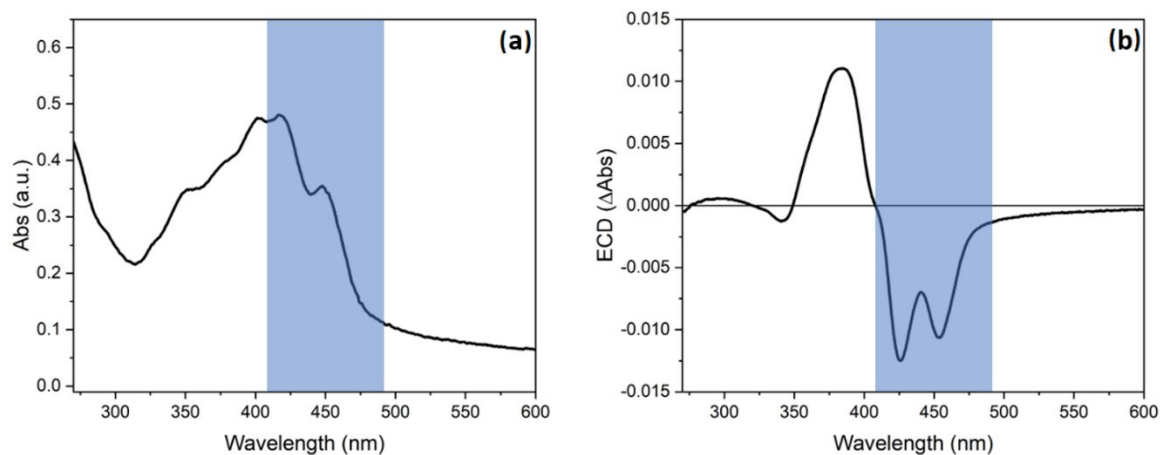

**Figure S1.** (a) Absorption spectrum of compound **1** in thin film. (b) ECD spectrum of compound **1** material in thin film. The blue semi-transparent rectangles indicate the spectral region selected with the bandpass filter centered at 450 nm (FWHM = 80 nm).

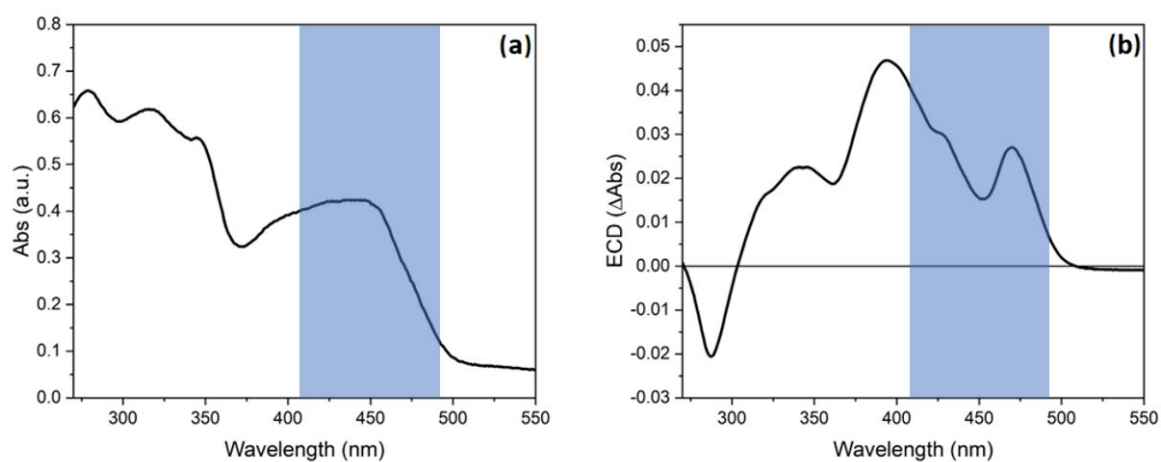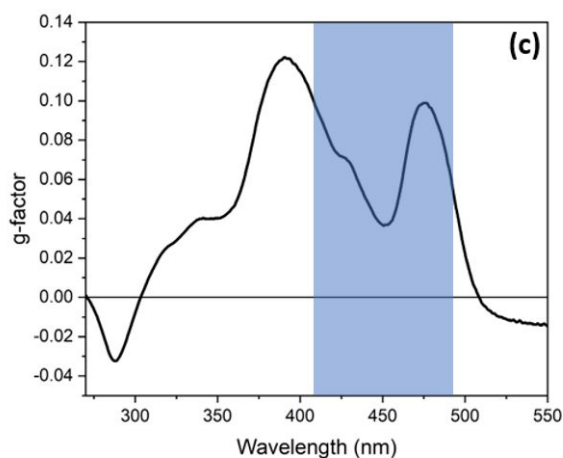

**Figure S2.** (a) Absorption spectrum of (S,S)-PTPO **2** in thin film. (b) ECD spectrum of (S,S)-PTPO **2** in thin film. (c) g-factor spectrum of (S,S)-PTPO **2** in thin film. The blue semi-transparent rectangles indicate the spectral region selected with the bandpass filter centered at 450 nm (FWHM = 80 nm).

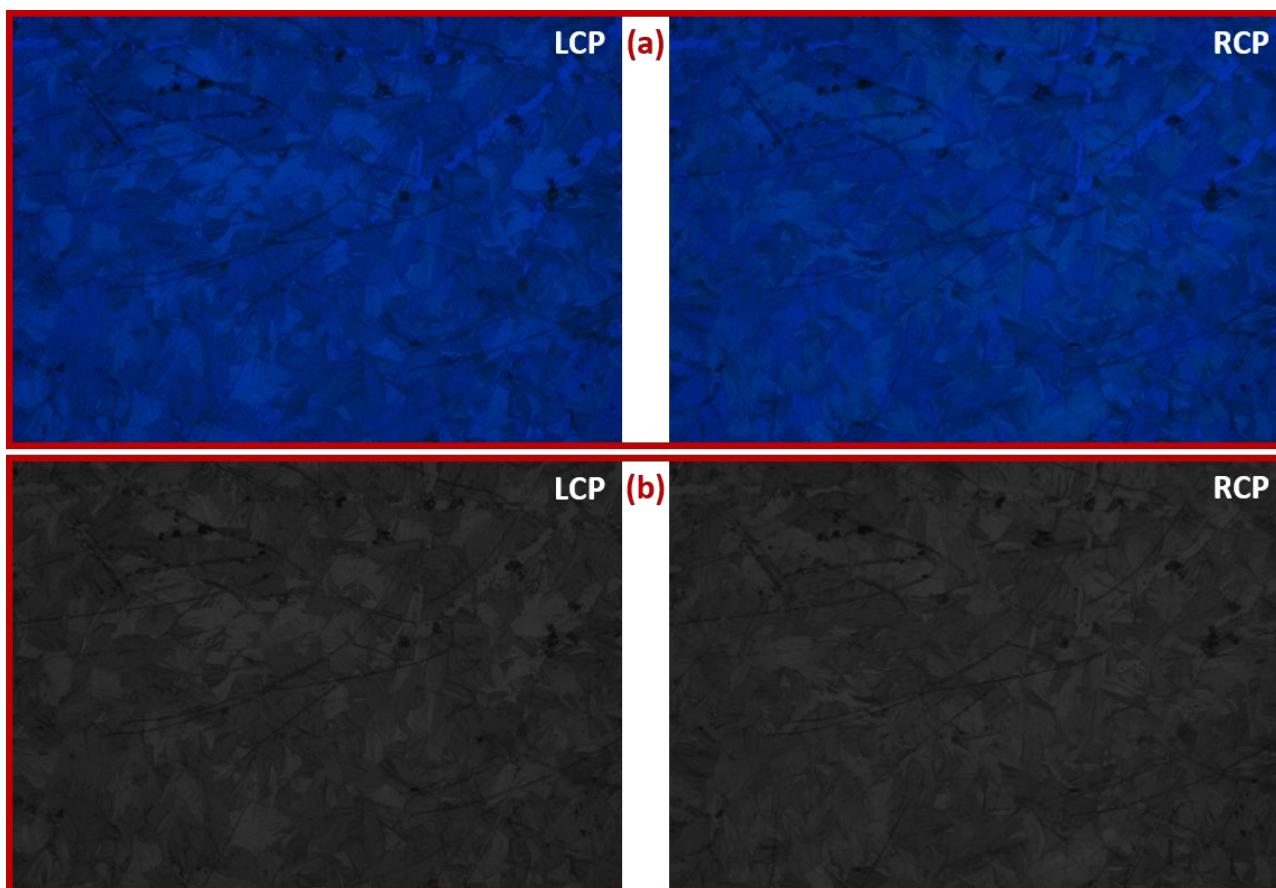

**Figure S3.** (a) Clippings analysed of the blue region images of (S,S)-PTPO **2** thin film under LCP and RCP back-illumination. (b) scale of grey images of the blue region clippings selected for (S,S)-PTPO **2** thin film.

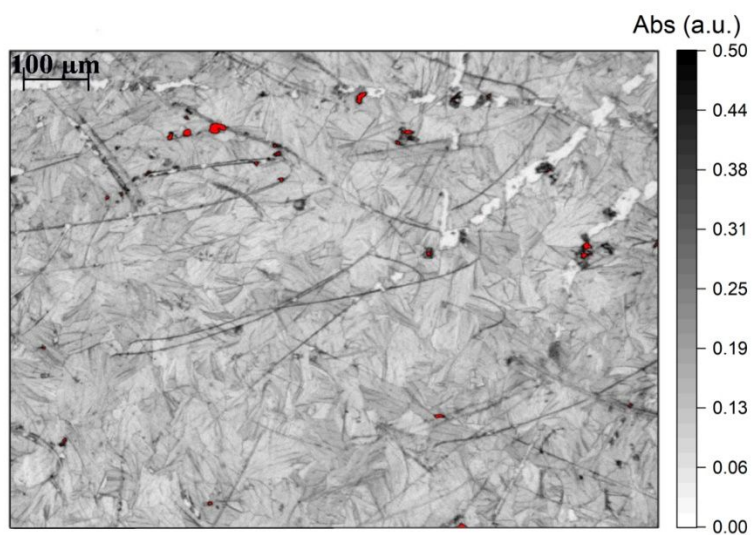

**Figure S4.** Absorbance map of the area of (S,S)-PTPO **2** thin film studied obtained as average between LCP and RCP absorbances. Red pixels represent outliers.
